# Supplementary material for: Angiotensin Receptor 1 Blockers Prolong Time to Recurrence after Radiofrequency Ablation in Hepatocellular Carcinoma patients: A Retrospective Study
Source: PubMed Central journal article supplement (PMC7599746; doi:10.3390/biomedicines8100399), 2020-10-08
Supplement: biomedicines-08-00399-s001.pdf [file biomedicines-08-00399-s001.pdf]

## RFA

| TTR | Recurrence | Last FU | Death | Therapy |
|-----|------------|---------|-------|---------|
| 3   | 0          | 18      | 1     | n       |
| 3   | 1          | 18      | 1     | n       |
| 3   | 1          | 21      | 1     | n       |
| 3   | 1          | 21      | 1     | n       |
| 4   | 1          | 49      | 1     | ACE     |
| 6   | 1          | 8       | 1     | n       |
| 6   | 1          | 8       | 1     | n       |
| 6   | 1          | 21      | 1     | n       |
| 6   | 1          | 21      | 1     | n       |
| 6   | 1          | 88      | 1     | ACE     |
| 8   | 1          | 10      | 1     | n       |
| 8   | 1          | 18      | 1     | n       |
| 8   | 1          | 18      | 1     | n       |
| 8   | 1          | 24      | 1     | n       |
| 8   | 1          | 49      | 1     | n       |
| 8   | 1          | 49      | 1     | n       |
| 9   | 1          | 11      | 1     | n       |
| 9   | 1          | 111     | 1     | ACE     |
| 9   | 1          | 11      | 1     | n       |
| 9   | 0          | 11      | 1     | n       |
| 11  | 1          | 14      | 1     | n       |
| 11  | 1          | 14      | 1     | ACE     |
| 12  | 1          | 21      | 1     | n       |
| 12  | 1          | 21      | 1     | n       |
| 12  | 1          | 34      | 1     | n       |
| 12  | 0          | 34      | 1     | ACE     |
| 12  | 1          | 58      | 1     | n       |
| 12  | 1          | 58      | 1     | n       |
| 14  | 1          | 20      | 1     | ACE     |
| 14  | 0          | 20      | 1     | n       |
| 14  | 1          | 25      | 1     | n       |
| 15  | 1          | 25      | 1     | n       |
| 15  | 1          | 25      | 1     | n       |
| 15  | 1          | 31      | 1     | n       |
| 15  | 1          | 31      | 1     | n       |
| 15  | 1          | 91      | 1     | sartan  |
| 15  | 0          | 31      | 1     | n       |
| 15  | 1          | 65      | 1     | n       |
| 18  | 1          | 24      | 1     | n       |
| 20  | 1          | 35      | 1     | sartan  |
| 23  | 1          | 42      | 1     | n       |
| 23  | 1          | 42      | 1     | n       |
| 24  | 1          | 51      | 1     | n       |
| 24  | 1          | 71      | 1     | n       |
| 26  | 0          | 29      | 1     | n       |
| 26  | 1          | 29      | 1     | n       |
| 26  | 1          | 29      | 1     | n       |
| 26  | 1          | 29      | 1     | n       |
| 27  | 1          | 42      | 1     | n       |
| 31  | 1          | 36      | 1     | ACE     |
| 31  | 1          | 35      | 1     | sartan  |
| 31  | 1          | 70      | 1     | ACE     |
| 31  | 1          | 70      | 1     | n       |
| 32  | 1          | 78      | 1     | n       |
| 33  | 1          | 48      | 1     | n       |
| 33  | 0          | 48      | 1     | ACE     |
| 34  | 1          | 55      | 1     | sartan  |
| 35  | 1          | 160     | 0     | n       |
| 21  | 1          | 37      | 0     | n       |
| 36  | 1          | 48      | 1     | sartan  |
| 36  | 1          | 62      | 1     | n       |
| 15  | 1          | 28      | 0     | n       |
| 38  | 1          | 42      | 1     | n       |
| 38  | 1          | 59      | 1     | n       |
| 42  | 0          | 48      | 1     | n       |
| 42  | 1          | 48      | 1     | sartan  |
| 42  | 1          | 49      | 1     | n       |
| 42  | 1          | 51      | 1     | n       |
| 42  | 1          | 51      | 1     | n       |
| 42  | 1          | 58      | 1     | sartan  |
| 42  | 1          | 98      | 0     | n       |
| 44  | 1          | 56      | 1     | sartan  |
| 44  | 1          | 85      | 0     | ACE     |
| 44  | 0          | 85      | 0     | ACE     |
| 46  | 1          | 68      | 1     | n       |
| 46  | 1          | 47      | 1     | sartan  |
| 47  | 1          | 51      | 1     | ACE     |
| 47  | 1          | 54      | 1     | n       |
| 48  | 1          | 49      | 1     | sartan  |
| 19  | 1          | 31      | 1     | sartan  |
| 53  | 1          | 87      | 1     | ACE     |
| 11  | 0          | 22      | 1     | sartan  |
| 56  | 1          | 88      | 1     | ACE     |
| 58  | 1          | 69      | 1     | n       |
| 58  | 1          | 69      | 1     | ACE     |
| 58  | 1          | 91      | 0     | sartan  |
| 15  | 1          | 25      | 1     | sartan  |
| 64  | 1          | 72      | 1     | ACE     |
| 14  | 0          | 34      | 0     | ACE     |
| 64  | 1          | 88      | 0     | n       |
| 69  | 1          | 84      | 1     | sartan  |
| 72  | 1          | 79      | 1     | sartan  |
| 72  | 1          | 79      | 1     | n       |
| 72  | 1          | 89      | 1     | ACE     |
| 72  | 0          | 89      | 1     | ACE     |
| 72  | 1          | 75      | 1     | ACE     |
| 77  | 1          | 92      | 1     | sartan  |
| 77  | 1          | 92      | 1     | sartan  |
| 2   | 0          | 27      | 1     | n       |
| 3   | 0          | 95      | 0     | n       |
| 3   | 0          | 95      | 1     | n       |
| 5   | 0          | 24      | 1     | n       |
| 5   | 1          | 28      | 1     | n       |
| 5   | 1          | 28      | 1     | n       |
| 6   | 1          | 48      | 1     | n       |
| 6   | 0          | 48      | 1     | n       |
| 8   | 0          | 72      | 1     | ACE     |
| 8   | 0          | 72      | 1     | n       |
| 18  | 0          | 18      | 1     | n       |
| 18  | 0          | 18      | 1     | ACE     |
| 38  | 0          | 38      | 1     | n       |
| 38  | 0          | 38      | 1     | ACE     |
| 41  | 1          | 41      | 1     | n       |
| 41  | 1          | 41      | 1     | ACE     |
| 46  | 1          | 46      | 1     | n       |
| 58  | 0          | 58      | 1     | n       |
| 70  | 0          | 70      | 0     | ACE     |
| 72  | 0          | 72      | 0     | ACE     |
| 72  | 0          | 72      | 0     | n       |
| 73  | 0          | 73      | 1     | sartan  |
| 74  | 1          | 74      | 0     | ACE     |
| 74  | 0          | 74      | 1     | ACE     |
| 75  | 1          | 75      | 1     | sartan  |
| 77  | 1          | 77      | 0     | n       |
| 77  | 0          | 77      | 1     | sartan  |
| 77  | 1          | 77      | 0     | ACE     |
| 77  | 1          | 77      | 0     | n       |
| 77  | 0          | 77      | 0     | n       |
| 78  | 0          | 78      | 0     | n       |
| 78  | 0          | 78      | 0     | ACE     |
| 78  | 1          | 78      | 0     | n       |
| 78  | 1          | 78      | 0     | ACE     |
| 78  | 0          | 78      | 0     | n       |
| 80  | 1          | 80      | 0     | ACE     |
| 82  | 0          | 82      | 1     | n       |
| 82  | 0          | 102     | 1     | ACE     |
| 83  | 0          | 103     | 1     | sartan  |
| 86  | 1          | 86      | 1     | n       |
| 86  | 1          | 188     | 1     | ACE     |
| 88  | 1          | 188     | 0     | ACE     |
| 88  | 0          | 188     | 0     | sartan  |
| 88  | 0          | 88      | 0     | n       |
| 88  | 1          | 188     | 1     | sartan  |
| 89  | 1          | 89      | 0     | n       |
| 90  | 0          | 90      | 1     | sartan  |
| 98  | 0          | 98      | 1     | ACE     |
| 99  | 0          | 99      | 1     | n       |
| 18  | 1          | 108     | 0     | n       |
| 188 | 1          | 208     | 0     | sartan  |
| 122 | 1          | 188     | 0     | n       |
| 166 | 0          | 166     | 0     | sartan  |
| 166 | 0          | 166     | 0     | n       |
| 166 | 0          | 166     | 0     | sartan  |
| 3   | 1          | 21      | 1     | n       |
| 3   | 1          | 21      | 1     | n       |
| 3   | 1          | 21      | 1     | n       |
| 3   | 1          | 21      | 1     | n       |
| 3   | 1          | 21      | 1     | n       |
| 3   | 1          | 21      | 1     | n       |
| 9   | 1          | 11      | 1     | ACE     |
| 9   | 1          | 11      | 1     | ACE     |
| 9   | 1          | 11      | 1     | ACE     |
| 9   | 1          | 11      | 1     | ACE     |
| 9   | 1          | 11      | 1     | ACE     |
| 9   | 1          | 11      | 1     | ACE     |
| 9   | 1          | 11      | 1     | ACE     |
| 9   | 1          | 11      | 1     | ACE     |
| 9   | 1          | 11      | 1     | ACE     |
| 9   | 1          | 11      | 1     | ACE     |
| 15  | 0          | 151     | 1     | sartan  |
| 15  | 1          | 15      | 1     | sartan  |
| 150 | 1          | 75      | 1     | sartan  |
| 15  | 0          | 51      | 1     | sartan  |
| 15  | 1          | 15      | 1     | sartan  |
| 15  | 1          | 15      | 1     | sartan  |
| 15  | 0          | 65      | 1     | sartan  |
| 15  | 1          | 65      | 1     | sartan  |
| 33  | 1          | 48      | 1     | n       |
| 33  | 0          | 48      | 1     | n       |
| 33  | 1          | 48      | 1     | n       |
| 33  | 1          | 48      | 1     | n       |
| 33  | 0          | 48      | 1     | n       |
| 33  | 1          | 48      | 1     | n       |
| 14  | 1          | 34      | 0     | ACE     |
| 14  | 1          | 34      | 0     | ACE     |
| 14  | 1          | 14      | 1     | ACE     |
| 14  | 1          | 14      | 1     | ACE     |
| 14  | 1          | 104     | 1     | ACE     |
| 14  | 1          | 14      | 1     | ACE     |
| 14  | 1          | 68      | 0     | ACE     |
| 33  | 0          | 33      | 0     | sartan  |
| 33  | 0          | 65      | 0     | sartan  |
| 33  | 0          | 73      | 1     | sartan  |
| 33  | 0          | 33      | 1     | sartan  |
| 33  | 0          | 33      | 1     | sartan  |
| 33  | 1          | 33      | 0     | sartan  |
| 33  | 0          | 33      | 1     | sartan  |
| 33  | 1          | 42      | 1     | ACE     |
| 23  | 1          | 42      | 1     | ACE     |
| 23  | 0          | 42      | 1     | ACE     |
| 23  | 1          | 42      | 1     | ACE     |
| 23  | 0          | 42      | 1     | ACE     |
| 23  | 1          | 42      | 1     | ACE     |
| 33  | 0          | 48      | 1     | n       |
| 33  | 1          | 48      | 1     | n       |
| 33  | 1          | 48      | 1     | n       |
| 33  | 1          | 48      | 1     | n       |
| 33  | 1          | 48      | 1     | n       |
| 33  | 0          | 48      | 1     | n       |
| 33  | 1          | 48      | 1     | n       |
| 33  | 0          | 48      | 1     | n       |
| 33  | 1          | 48      | 1     | n       |
| 33  | 1          | 48      | 1     | n       |
| 33  | 0          | 48      | 1     | n       |
| 33  | 1          | 48      | 1     | n       |
| 33  | 0          | 48      | 1     | n       |
| 33  | 1          | 48      | 1     | n       |
